# Supplementary material for: The basic reproduction number of COVID-19 across Africa
Source: PubMed Central journal article supplement (PMC8880647; doi:10.1371/journal.pone.0264455), 2022-02-25
Supplement: pone.0264455.s001.pdf [file pone.0264455.s001.pdf]

## A Appendix

**Table A1.** List of countries, their population sizes, date of their index case of COVID-19, and the non-pharmaceutical interventions (NPIs) implemented against COVID-19 in the early stage of the disease in the countries with dates. The population sizes are for the year 2020 and were obtained from the worldometer population website [78]. When an interval is specified for the date of NPIs, it means the implementation of the NPIs started on a day within the specified interval.

| Country      | Population size | Date of First confirmed COVID-19 case | Non-pharmaceutical interventions implemented with date                                                                                            |
|--------------|-----------------|---------------------------------------|---------------------------------------------------------------------------------------------------------------------------------------------------|
| Nigeria      | 206,139,589     | 27-Feb-2020 [79, 80]                  | <b>Mar 18 - Apr 10:</b> Travel restrictions, lockdown of non-essential activities and stay-at-home orders in Abuja, Lagos and Ogun States [74].   |
| Ghana        | 31,072,940      | 12-Mar-2020 [81, 82]                  | <b>Mar 22:</b> Travel restrictions [83]. Lockdown was imposed in parts of Accra and Kumasi on Mar 30 [75].                                        |
| Senegal      | 16,743,927      | 01-Mar-2020 [81, 84]                  | <b>Mar 14 - 22:</b> Closure of schools, travel restrictions, and state of emergency [85, 86].                                                     |
| Mali         | 20,250,833      | 25-Mar-2020 [87]                      | <b>Mar 18:</b> Travel restrictions, closure of schools, and ban on public gathering [76].                                                         |
| South Africa | 59,308,690      | 05-Mar-2020 [81]                      | <b>Mar 27:</b> National lockdown (see [88, 89] for details).                                                                                      |
| Zambia       | 18,383,955      | 18-Mar-2020 [90]                      | <b>Mar 20:</b> Closure of schools, colleges and universities, and travel restrictions [91].                                                       |
| Namibia      | 2,540,905       | 13-Mar-2020 [81, 92]                  | <b>Mar 17:</b> State of emergency, travel restrictions, ban on large gatherings, mandatory quarantine, and lockdown in parts of the country [93]. |
| Malawi       | 19,129,952      | 01-Apr-2020 [94]                      | <b>Apr 24:</b> 21-day lockdown [95, 96].                                                                                                          |
| Egypt        | 102,334,404     | 14-Feb-2020 [81, 92]                  | <b>Mar 15 - 25:</b> Travel restrictions, closure of schools, workplaces, and lockdown [97].                                                       |
| Tunisia      | 11,818,619      | 2-Mar-2020 [81, 92]                   | <b>Mar 20:</b> Travel restrictions, closure of mosque, cafes, and markets [98].                                                                   |
| Algeria      | 43,851,044      | 25-Feb-2020 [81, 92]                  | <b>Mar 9:</b> International travel restriction, public gathering limitation, quarantine, and lockdown [99].                                       |
| Morocco      | 36,910,560      | 2-Mar-2020 [81, 92]                   | <b>Mar 20:</b> Closure of airports, schools, mosques, businesses (except markets), ban on large gatherings, implement social distancing [100].    |

**Table A2.** Same caption as Table A1

| Country               | Population size | Date of First confirmed COVID-19 case | Non-pharmaceutical interventions implemented with date                                                                                                                             |
|-----------------------|-----------------|---------------------------------------|------------------------------------------------------------------------------------------------------------------------------------------------------------------------------------|
| Ethiopia              | 114,963,588     | 13-Mar-2020 [81,92]                   | <b>Mar 16 - 23:</b> Suspension of schools, sporting events, and public gatherings for 15 days. Closure of night clubs and all land borders [101,102].                              |
| Kenya                 | 53,771,296      | 13-Mar-2020 [81,92]                   | <b>Mar 15-25:</b> Closure of all learning institutions, bars and restaurants, ban on social gathering, travel restrictions, dusk to dawn curfew imposed [103].                     |
| Rwanda                | 12,952,218      | 14 March 2020 [104]                   | <b>Mar 20:</b> National lockdown and banning of all non-essential travel, labour, and businesses [105].                                                                            |
| Sudan                 | 43,849,260      | 13-Mar-2020 [81,92]                   | <b>Mar 16 - 24:</b> Closure of airports, nationwide curfew and lockdown [106].                                                                                                     |
| Cameroon              | 26,545,863      | 6-Mar-2020 [92]                       | <b>Mar 18:</b> Closure of land, air and sea borders, and mandatory mask wearing in public spaces on April 13 [107].                                                                |
| Chad                  | 16,425,864      | 19-Mar-2020 [108]                     | <b>Apr 13:</b> Closure of schools and workplaces, and partial lockdown in different regions [109].                                                                                 |
| Gabon                 | 2,225,734       | 13-Mar-2020 [81,92]                   | <b>Jul 1:</b> Suspension of visas for all European travelers [110].                                                                                                                |
| Republic of the Congo | 5,518,087       | 10-Mar-2020 [92]                      | <b>Mar 31:</b> Nationwide lockdown [111].                                                                                                                                          |
| Madagascar            | 27,691,018      | 19-Mar-2020 [112]                     | <b>Mar 20 - 31:</b> Suspension of international and regional flights [113]. Lockdown in at least two cities [114].                                                                 |
| Comoros               | 869,601         | 30-Apr-2020 [115]                     | <b>Apr 30:</b> Curfew imposed, and mandatory wearing of masks outdoors on the whole territory implement on July 8 [116,117]                                                        |
| Mauritius             | 4,649,658       | 18-Mar-2020 [118]                     | <b>Mar 20:</b> Nationwide "sanitary" lockdown. Essential services and certain economic services, and minimum public transport are allowed to operate (see [119] for more details). |
| Cape Verde            | 555,987         | 19-Mar-2020 [120]                     | <b>Mar 28:</b> Nationwide state of emergency imposed [121].                                                                                                                        |
